# Supplementary material
Source: PubMed Central journal article supplement (PMC9673410)
Supplement: 13034_2022_522_MOESM4_ESM.pdf [file 13034_2022_522_MOESM4_ESM.pdf]

**Overview of participants in the qualitative study**Expert Interviews

| ID   | Date of interview | Field of work              | Position                                                                   |
|------|-------------------|----------------------------|----------------------------------------------------------------------------|
| EXP1 | 18.03.2020        | Psychologist               | Head of school psychological counseling center                             |
| EXP2 | 23.03.2020        | Software developer         | Expert in medical technology and mobile health applications                |
| EXP3 | 26.03.2020        | Social pedagogue           | Managing director of non-governmental organization for youth participation |
| EXP4 | 26.03.2020        | Media educator / pedagogue | Head of media center                                                       |
| EXP5 | 30.04.2020        | Psychologist               | Head of psychological counseling center                                    |

Focus Groups

| ID      | Date of interview | Group | Age | Gender | Education                                  | Job title                                                                     |
|---------|-------------------|-------|-----|--------|--------------------------------------------|-------------------------------------------------------------------------------|
| P1, FG1 | 25.03.2020        | 1     | 17  | female | currently attending Gymnasium <sup>1</sup> | Student/Pupil, Gymnasium <sup>1</sup>                                         |
| P2, FG1 | 25.03.2020        | 1     | 20  | male   | Abitur <sup>2</sup>                        | Part time job in retail; waiting for start of semester / university           |
| P3, FG1 | 25.03.2020        | 1     | 17  | female | currently visiting Gymnasium <sup>1</sup>  | Student/Pupil, Gymnasium <sup>1</sup>                                         |
| P4, FG1 | 25.03.2020        | 1     | 20  | male   | Abitur <sup>2</sup>                        | Part time in Software Development; waiting for start of semester / university |
| P1, FG2 | 16.04.2020        | 2     | 20  | female | Abitur <sup>2</sup>                        | Student in economics                                                          |
| P2, FG2 | 16.04.2020        | 2     | 20  | female | Abitur <sup>2</sup>                        | Student in medicine                                                           |
| P3, FG2 | 16.04.2020        | 2     | 15  | male   | currently visiting Gymnasium <sup>1</sup>  | Student/Pupil, Gymnasium <sup>1</sup>                                         |
| P4, FG2 | 16.04.2020        | 2     | 20  | male   | Abitur                                     | Student in economics                                                          |

<sup>1</sup> Secondary school leading to the "Abitur". Prepares students for higher education at a university, comparable to preparatory high school in the US.

<sup>2</sup> Abitur = diploma corresponding to university entrance level, equivalent to the baccalauréat (FR, LT), the matura (PL, AT), etc.
