# Supplementary material
Source: PubMed Central journal article supplement (PMC9673410)
Supplement: 13034_2022_522_MOESM6_ESM.pdf [file 13034_2022_522_MOESM6_ESM.pdf]

## Coding Trees<sup>1,2</sup>

### Focus Groups: Coding Tree

| FIRST LEVEL                                   | SECOND LEVEL                                                      | THIRD LEVEL                                                       |
|-----------------------------------------------|-------------------------------------------------------------------|-------------------------------------------------------------------|
| K1: Concepts of "mental health"               | K1_U1: Successful handling of challenges                          | -                                                                 |
|                                               | K1_U2: Awareness / understanding of physical and mental condition | -                                                                 |
| K2: Activities to promote one's mental health | K2_U1: Meditation                                                 | -                                                                 |
|                                               | K2_U2: Crafting / meditative activity(s)                          | -                                                                 |
|                                               | K2_U3: Physical activity                                          | -                                                                 |
|                                               | K2_U4: Being alone / withdrawal                                   | -                                                                 |
|                                               | K2_U5: Social contacts                                            | -                                                                 |
|                                               | K2_U6 Paying attention to nutrition                               | -                                                                 |
|                                               | K2_U7 Paying attention to sleep and waking times                  | -                                                                 |
|                                               | K2_U8 Distancing from technology / technologies                   | -                                                                 |
|                                               | K2_U9 Uncertainty / no strategies                                 | -                                                                 |
| K3: Use of "health-promoting apps"            | K3_U1: Current usage of certain apps                              | K3_U1_UU1: Sports and Fitness                                     |
|                                               |                                                                   | K3_U1_UU2: Sleep Optimization                                     |
|                                               |                                                                   | K3_U1_UU3: Meditation and mindfulness                             |
|                                               |                                                                   | K3_U1_UU4: Others                                                 |
|                                               | K3_U2: Reasons for no longer using such apps                      | K3_U2_UU1: App goal met - no need anymore                         |
|                                               |                                                                   | K3_U2_UU2: Unreliability of the app                               |
|                                               |                                                                   | K3_U2_UU3: Too tiring to use                                      |
|                                               |                                                                   | K3_U2_UU4: App unsuitable for desired goal                        |
|                                               |                                                                   | K3_U2_UU5: Detail / structure of the app was annoying             |
|                                               |                                                                   | K3_U2_UU6: Payment model as an obstacle to continue using the app |
|                                               |                                                                   | K3_U2_UU7: In general, apps not of particular interest            |

<sup>1</sup> The data analysis was conducted in German. The coding trees were later translated to English.

<sup>2</sup> The coding trees contain all categories from data analysis. Emerged subthemes are depicted in level 2 and, if further differentiation was possible, also in sublevel 3. Not shown here are codes and codings, which exceeds the scope of this overview.

| FIRST LEVEL                                                             | SECOND LEVEL                                                        | THIRD LEVEL                                               |
|-------------------------------------------------------------------------|---------------------------------------------------------------------|-----------------------------------------------------------|
|                                                                         | K3_U3: Reasons for using an app in the past                         | K3_U3_UU1 Just trying out (without "goal")                |
|                                                                         |                                                                     | K3_U3_UU2 Problem/Goal-oriented use of the apps           |
| K4: Use of health-related Apps in the circle of friends and B           | -                                                                   | -                                                         |
| K5: Concept of artificial intelligence                                  | -                                                                   | -                                                         |
| K6: Knowledge about the use of artificial intelligence in everyday life | K6_U1: Use of AI in advertising                                     | -                                                         |
|                                                                         | K6_U2: Use of AI in social media                                    | -                                                         |
|                                                                         | K6_U3: Use of AI in various contexts                                | -                                                         |
|                                                                         | K6_U4: Use of AI theme in science fiction                           | -                                                         |
| K7: Attitude towards the use of AI in general                           | K7_U1: Critical, negative attitude, skepticism                      | -                                                         |
|                                                                         | K7_U2: neutral / conditionally positive: open but critical attitude | -                                                         |
|                                                                         | K7_U3: positive, expectant: surprised about technical possibilities | -                                                         |
|                                                                         | K7_U4 No statement                                                  | -                                                         |
| K8: Questions/ambiguities regarding the input of the planned AI app     | -                                                                   | -                                                         |
| K9: Feedback on the AI4U-App after input                                | K9_U1: Emphasis on customizability of the app                       |                                                           |
|                                                                         | K9_U2: Emphasis on the broad tableau of exercises                   | -                                                         |
| K10: Concerns about the use of existing AI                              | K10_U1: Concerns about the use of the AI4U app                      | K10_U1_UU1: No / few concerns about AI use                |
|                                                                         |                                                                     | K10_U1_UU2: major concerns about using the present AI APP |

| FIRST LEVEL                                   | SECOND LEVEL                                               | THIRD LEVEL                                                                                                                                                                                                                                                                                                                                                               |
|-----------------------------------------------|------------------------------------------------------------|---------------------------------------------------------------------------------------------------------------------------------------------------------------------------------------------------------------------------------------------------------------------------------------------------------------------------------------------------------------------------|
|                                               | K10_U2: Shareable information                              | K10_U2_UU1: Requirements for sharing information<br>K10_U2_UU2: (Un)critical information<br>K10_U2_UU3: Doubts about functionality for major mental health issues                                                                                                                                                                                                         |
| K11: Wishes / ideas / suggestions for the app | K11_U1: Possible difficulties / problems of an mHealth app | K11_U2_UU1: Too much effort for use<br>K11_U2_UU2: App makes inaccurate/bad suggestions<br>K11_U2_UU3: Important: control over personalization options.                                                                                                                                                                                                                   |
|                                               | K11_U2: Desired exercises / trainings / functions          | K11_U2_UU1: App provides an overview of possible exercises<br>K11_U2_UU2: App suggests solutions in difficult situations<br>K11_U2_UU3: App provides background information for exercises<br>K11_U2_UU4: No sharing of exercises / achievements with others<br>K11_U2_UU5: No sharing of problems/issues with others<br>K11_U2_UU6: App suggests distance to mobile phone |
| K12: (Types of) collaboration on the app      | K12_U1: Interested in working                              | -                                                                                                                                                                                                                                                                                                                                                                         |
|                                               | K12_U2: Possibilities / type / idea of participation       | -                                                                                                                                                                                                                                                                                                                                                                         |

## Expert Interviews: Coding Tree

| FIRST LEVEL                                                                                                                     | SECOND LEVEL                                                      | THIRD LEVEL                                         |  |
|---------------------------------------------------------------------------------------------------------------------------------|-------------------------------------------------------------------|-----------------------------------------------------|--|
| K1: Professional position / Field of work                                                                                       | -                                                                 | -                                                   |  |
| K2: Mental health promotion (MHP) and mental disorder prevention in young people (YP) in the professional context of the expert | K2_U1: Terminology / Definition of Mental Health Promotion        | -                                                   |  |
|                                                                                                                                 | K2_U2: Current status / relevance of MHP in YP                    | -                                                   |  |
| K3: Relevance of apps for MHP in YP from the expert's point of view                                                             | K3_U1: Current importance and nature of apps                      | -                                                   |  |
|                                                                                                                                 | K3_U2: Problems / barriers for apps                               | -                                                   |  |
| K4: Input for creating an app with AI for MHP in YP                                                                             | K4_U0 Take into account the need structure of YP                  | -                                                   |  |
|                                                                                                                                 | K4_U1 Forwarding YP to help centers for "bigger problems" / risks | -                                                   |  |
|                                                                                                                                 | K4_U2 Target group-oriented approach / language                   | -                                                   |  |
|                                                                                                                                 | K4_U3 Character / form of possible interventions in the app       | K4_U3_UU1 Give stories / everyday examples          |  |
|                                                                                                                                 |                                                                   | K4_U3_UU2 App gives recommendations and ideas       |  |
|                                                                                                                                 |                                                                   | K4_U3_UU3 Initiation of self-reflection             |  |
|                                                                                                                                 |                                                                   | K4_U3_UU4 Interventions to experience self-efficacy |  |
|                                                                                                                                 | K4_U4 Content of possible interventions in the app                | K4_U4_UU1 Psychoeducation / knowledge transfer      |  |
|                                                                                                                                 |                                                                   | K4_U4_UU2 Emotion regulation                        |  |
|                                                                                                                                 |                                                                   | K4_U4_UU3 Self-acceptance / self-worth              |  |
|                                                                                                                                 |                                                                   | K4_U4_UU4 Physical activity                         |  |
| K4_U4_UU5 Improve social skills / dealing with others                                                                           |                                                                   |                                                     |  |
| K5: Chances of apps with AI for MHP in YP                                                                                       | K5_U1 App as low-threshold access to YP                           | -                                                   |  |
|                                                                                                                                 | K5_U2 App supports search for help and treatment                  | -                                                   |  |
|                                                                                                                                 | K5_U3 Reaching risk groups early on                               | -                                                   |  |

| FIRST LEVEL                                                   | SECOND LEVEL                                               | THIRD LEVEL                                        |
|---------------------------------------------------------------|------------------------------------------------------------|----------------------------------------------------|
|                                                               | K5_U4 App as a holistic solution                           | -                                                  |
| K6: Limits of / risks in apps with AI for MHP in YP           | K6_U1 No risks / few concerns                              | -                                                  |
|                                                               | K6_U2 (Possible) Risks for YP                              | K6_U2_UU1 Risks to enforce self-optimization in YP |
|                                                               |                                                            | K6_U2_UU2 Risks from difficult topics              |
|                                                               |                                                            | K6_U2_UU3 Risks from financial interests           |
| K7: Participation of practitioners in the creation of the app | K7_U1 Requirements for participation of practitioners      | -                                                  |
|                                                               | K7_U2 Focus for individual participation                   | -                                                  |
|                                                               | K7_U3 Suggestions for the inclusion of other practitioners | -                                                  |
|                                                               | K7_U4 Input in preliminary/ application phase              | -                                                  |
| K8: Prospective development of MHP of YP (in 5 years)         | K8_U1 Integration of AI and MHP into school lessons        | -                                                  |
|                                                               | K8_U2 AI-Apps as a supplement to real consulting offers    | -                                                  |
|                                                               | K8_U3 Other implementation options of the app              | -                                                  |
